# Supplementary material for: Pyrazine-driven dinuclear assembly of dysprosium( iii ) β-diketonate complex: a fluxidentate bridging approach toward functional near-white luminescent materials
Source: Royal Society of Chemistry journal article supplement (doi:10.1039/d5ra05762k), 2025-01-01
Supplement: d5ra05762k1.pdf [file d5ra05762k1.pdf]

## Pyrazine-Driven Dinuclear Assembly of Dysprosium(III) $\beta$ -Diketonate Complex: A Fluxidentate Bridging Approach Toward Functional Near-White Luminescent Materials

Vandana Aggarwal<sup>a</sup>, Devender Singh<sup>a, b\*</sup>, Sonia Redhu<sup>a</sup>, Shri Bhagwan<sup>a</sup>, Sumit Kumar<sup>c</sup>, Rajender Singh Malik<sup>c</sup>, Parvin Kumar<sup>d</sup> and Jayant Sindhu<sup>e</sup>

<sup>a</sup>Department of Chemistry, Maharshi Dayanand University, Rohtak-124001, Haryana, India

<sup>b</sup>Department of Chemistry, Lovely Professional University, Phagwara, Jalandhar, 14441, Punjab, India

<sup>c</sup>Department of Chemistry, DCR University of Science & Technology, Murthal -131039 Haryana, India.

<sup>d</sup>Department of Chemistry, Kurukshetra University Kurukshetra -136119, Haryana, India.

<sup>e</sup>Department of Chemistry, COBS&H, CCS Haryana Agricultural University, Hisar-125004, Haryana, India

### SUPPLEMENTARY INFORMATION

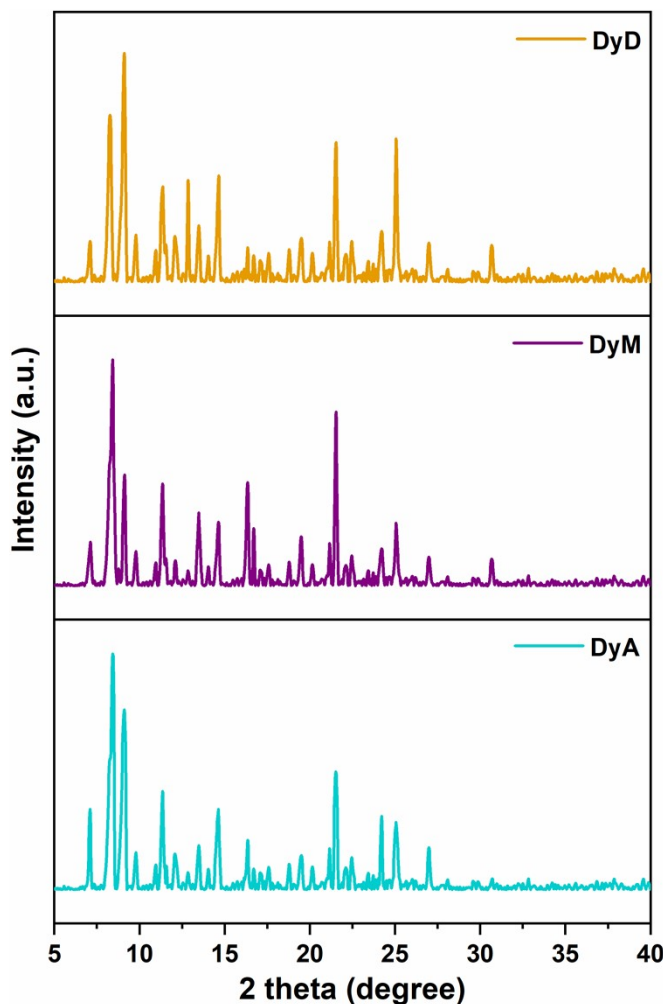

**Fig. S1** Powder XRD profiles of DyA-DyD

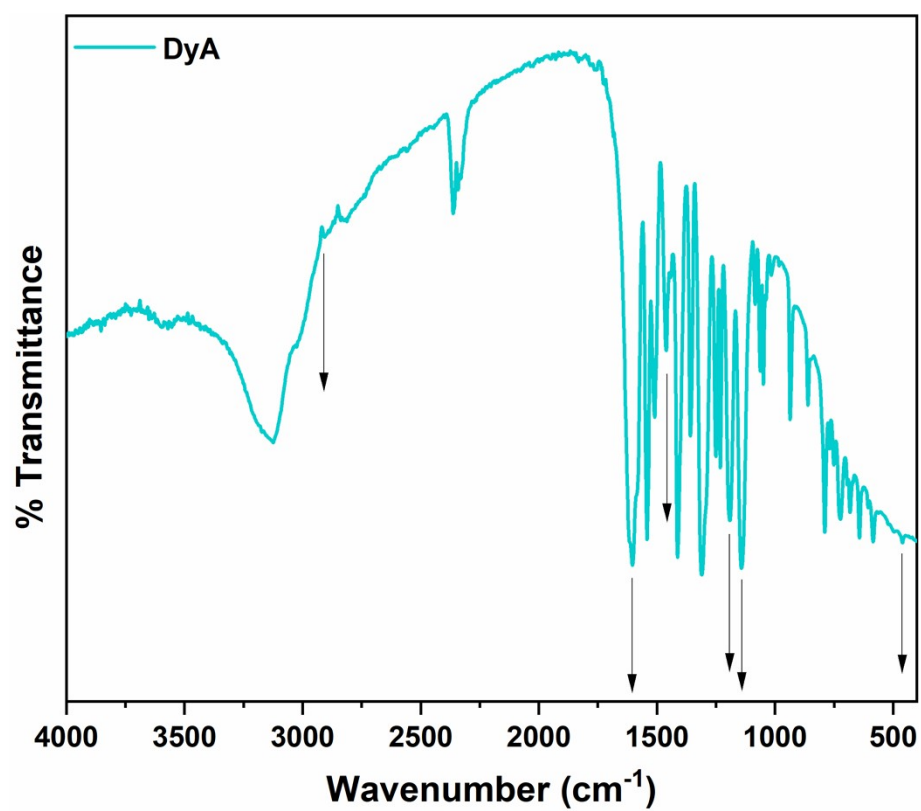

**Fig. S2** FTIR spectra of DyA

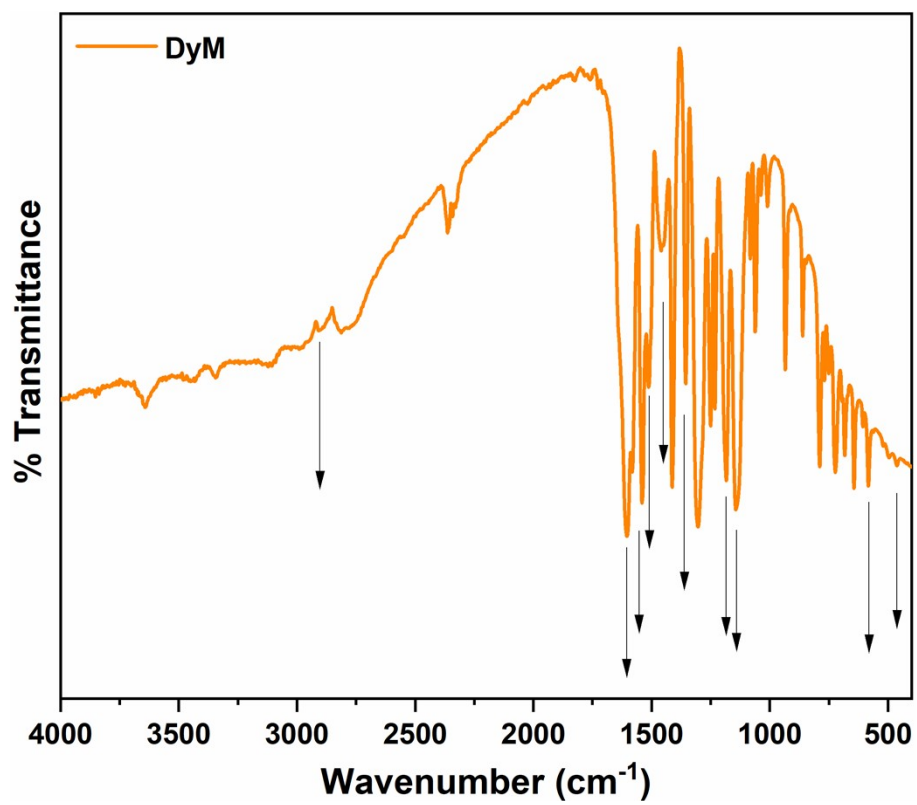

Fig. S3 FTIR spectra of DyM

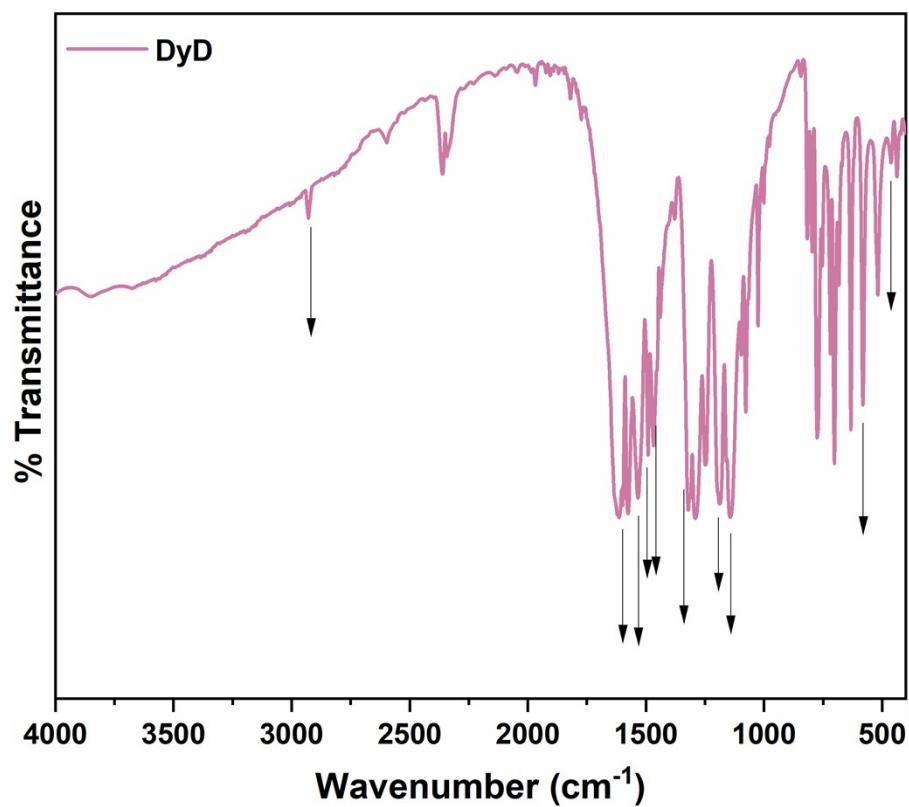

Fig. S4 FTIR spectra of DyD

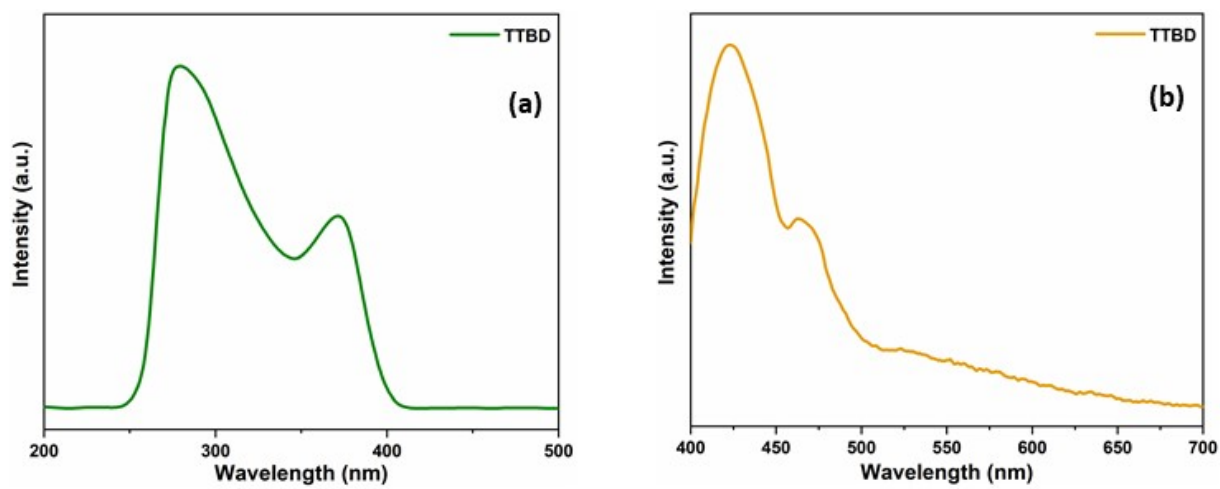

Fig. S5 (a) PL excitation and (b) emission of TTBD
